# Supplementary material for: Novel ligands and complexes in situ generated from the copper-mediated conversions of 2,5-bis(2-hydroxyphenyl)-1,3,4-oxadiazole: structures and magnetic properties
Source: Royal Society of Chemistry journal article supplement (doi:10.1039/c0ce00907e), 2011-01-01
Supplement: c0ce00907e.pdf [file c0ce00907e.pdf]

**Novel ligands and complexes in situ generated from the copper-mediated conversions of 2,5-bis(2-hydroxyphenyl)-1,3,4-oxadiazole: structures and magnetic properties**

Zhen-Lan Fang,\* Rong-Min Yu, Jie Zhang, and Can-Zhong Lu\*

The State Key Laboratory of Structural Chemistry, Fujian Institute of Research on the Structure of Matter, The Chinese Academy of Sciences, Fuzhou, Fujian, 350002, P.R. China.

## Figure Captions.

**Figure S1.** EPR spectrum of **1**.

**Figure S2.** EPR spectrum of **2**.

**Figure S3.** FT-IR spectrum for **1**.

**Figure S4.** FT-IR spectrum for **2**.

**Figure S5.** XRPD patterns of original crystal (red) and simulated from a single crystal of **1** (dark).

**Figure S6.** XRPD patterns of original crystal (red) and simulated from a single crystal of **2** (dark).

**Figure S7.** TGA profile for **1**.

**Figure S8.** TGA profile for **2**.

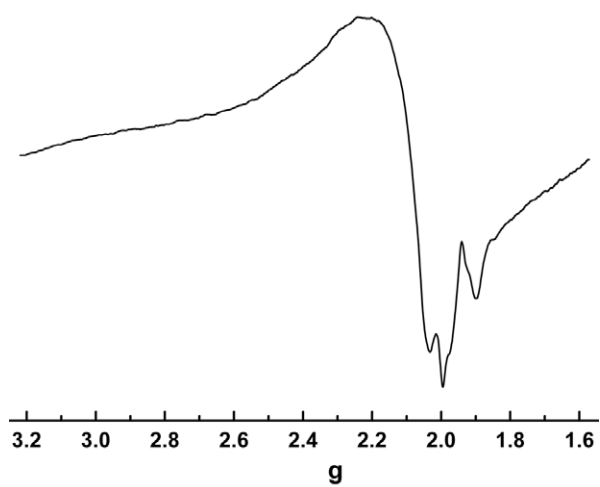

**Figure S1.** EPR spectrum of **1**.

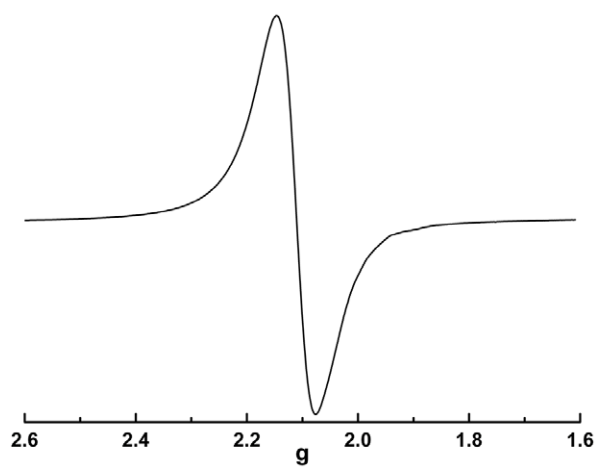

**Figure S2.** EPR spectrum of **2**.

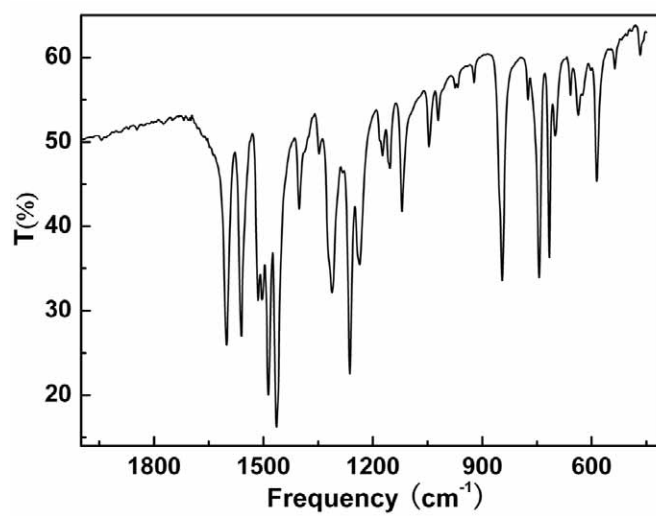

**Figure S3.** FT-IR spectrum for **1**.

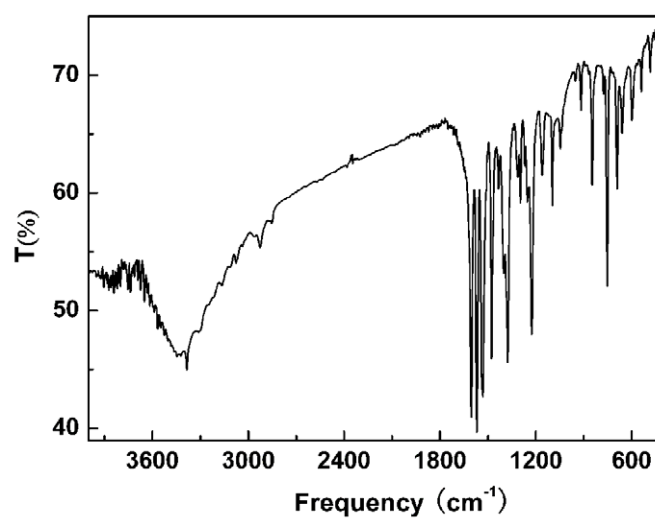

**Figure S4.** FT-IR spectrum for **2**.

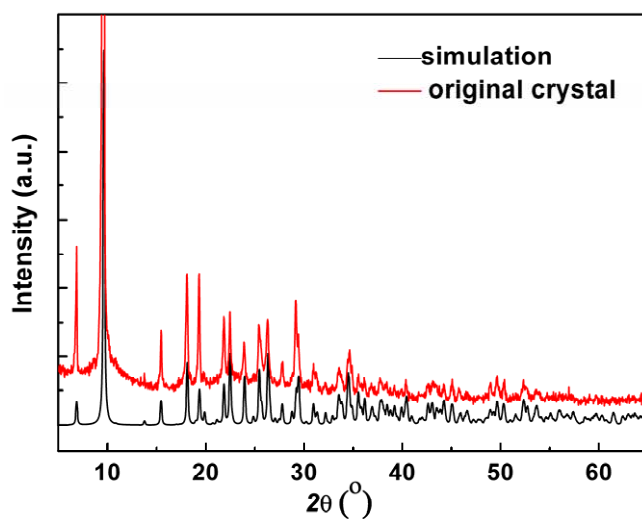

**Figure S5.** XRPD patterns of original crystal (red) and simulated from a single crystal of **1** (dark).

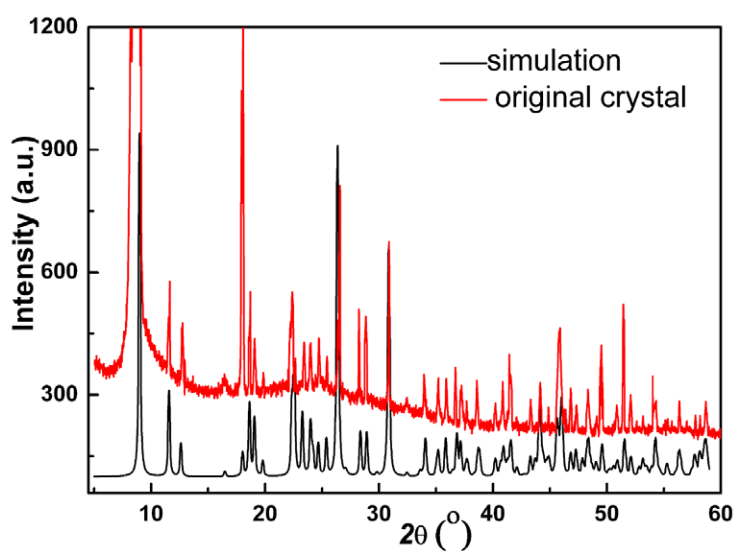

**Figure S6.** XRPD patterns of original crystal (red) and simulated from a single crystal of **2** (dark).

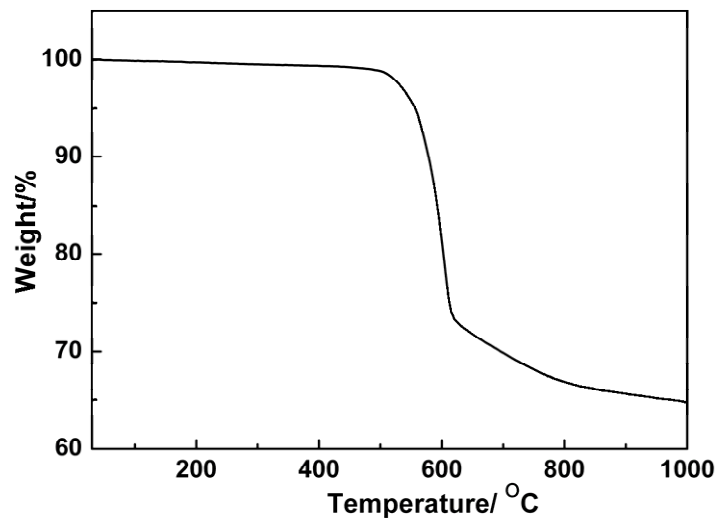

**Figure S7.** TGA profile for 1.

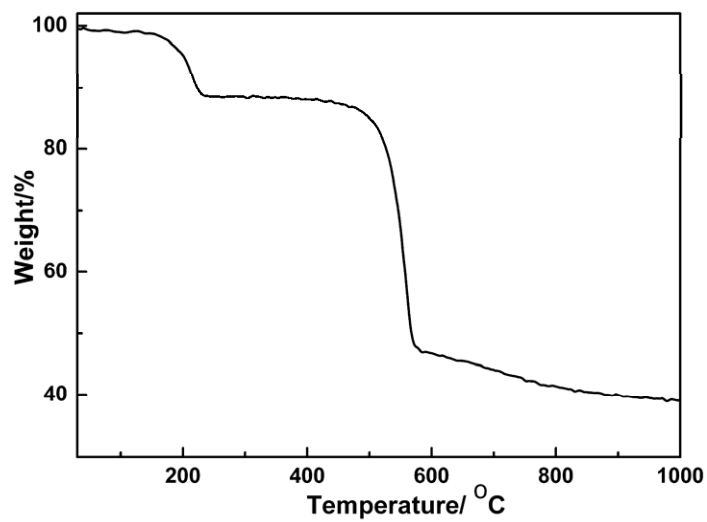

**Figure S8.** TGA profile for 2.
